# Supplementary material
Source: HighWire-hosted journal article supplement (https://www.jrheum.org/highwire/filestream/42013/field_highwire_adjunct_files/0/211199DataSuppl.pdf)
Supplement: 211199DataSuppl.pdf [file 211199DataSuppl.pdf]

Table S1. Numbers and proportions of patients on MTX or bDMARDs at 12 months.

|                        | Cohort 1      |           |           |           |
|------------------------|---------------|-----------|-----------|-----------|
| Treatment at 12 months | ACPA +        |           | ACPA -    |           |
|                        | Females       | Males     | Females   | Males     |
| MTX                    | 53 (57.6)     | 25 (65.8) | 38 (57.6) | 15 (51.7) |
| bDMARDs                | 0             | 0         | 0         | 0         |
|                        | Cohort II     |           |           |           |
| Treatment at 12 months | ACPA +        |           | ACPA -    |           |
|                        | Females       | Males     | Females   | Males     |
| MTX                    | 68 (64.8)     | 19 (61.3) | 22 (53.7) | 16 (66.7) |
| bDMARDs                | 29 (27.6)     | 14 (45.2) | 10 (24.4) | 4 (16.7)  |
|                        | Pooled cohort |           |           |           |
| Treatment at 12 months | ACPA +        |           | ACPA -    |           |
|                        | Females       | Males     | Females   | Males     |
| MTX                    | 121 (61.4)    | 44 (63.8) | 60 (56.1) | 31 (58.5) |
| bDMARDs                | 29 (14.7)     | 14 (20.3) | 10 (9.3)  | 4 (7.5)   |

Table S2. Proportion of patients in remission according to CDAI (CDAI ≤2.8). Pooled cohort

|                     | ACPA +    |          | ACPA -   |            |
|---------------------|-----------|----------|----------|------------|
|                     | Females   | Males    | Females  | Males      |
| 6 months: patients  | 129       | 52       | 79       | 34         |
| CDAI remission      | 10 (7.8)  | 3 (5.8)  | 8 (10.1) | 6 (17.6)   |
| 12 months: patients | 127       | 49       | 80       | 35         |
| CDAI remission      | 16 (12.6) | 7 (14.3) | 6 (7.5)  | 10 (28.6)* |

\*p&lt;0.005 versus females.

Outcomes are frequencies (%)

Table S3. Role of sex in prediction of CDAI remission in ACPA-positive and ACPA-negative early RA patients. Logistic regression. OR (95% CI). Pooled cohort.

| Outcome                    | Covariate | ACPA +           | ACPA -                  |
|----------------------------|-----------|------------------|-------------------------|
| CDAI remission (6 months)  | Male sex  | 0.84 (0.21-3.25) | 1.68 (0.51-5.57)        |
| CDAI remission (12 months) | Male sex  | 1.57 (0.52-4.77) | <b>4.65 (1.43-15.1)</b> |

Adjusted for age, DAS28 at baseline, HAQ at baseline.

Table S4. Relation for sex, ACPA status and their interaction CDAI remission in early RA patients. Logistic regression. OR (95% CI). Pooled Cohort.

| Outcome                    | Covariate            | Adjusted model <sup>¶</sup> |
|----------------------------|----------------------|-----------------------------|
| CDAI remission (6 months)  | Male sex             | 2.01 (0.62-6.5)             |
|                            | ACPA positive        | 0.73 (0.27-1.94)            |
|                            | Interaction sex*ACPA | 0.37 (0.63-2.18)            |
| CDAI remission (12 months) | Male sex             | 6.53 (2.0-21.3)             |
|                            | ACPA positive        | 1.66 (0.60-4.57)            |
|                            | Interaction sex*ACPA | 0.20 (0.04-0.93)            |

<sup>¶</sup>Adjusted for the variables in the table and age, DAS28 at baseline, HAQ at baseline
